# Supplementary material for: Gene Expression Changes Induced by Trypanosoma cruzi Shed Microvesicles in Mammalian Host Cells: Relevance of tRNA-Derived Halves
Source: PubMed Central journal article supplement (PMC4000953; doi:10.1155/2014/305239), 2014-04-09
Supplement: 305239.f3.pdf [file 305239.f3.pdf]

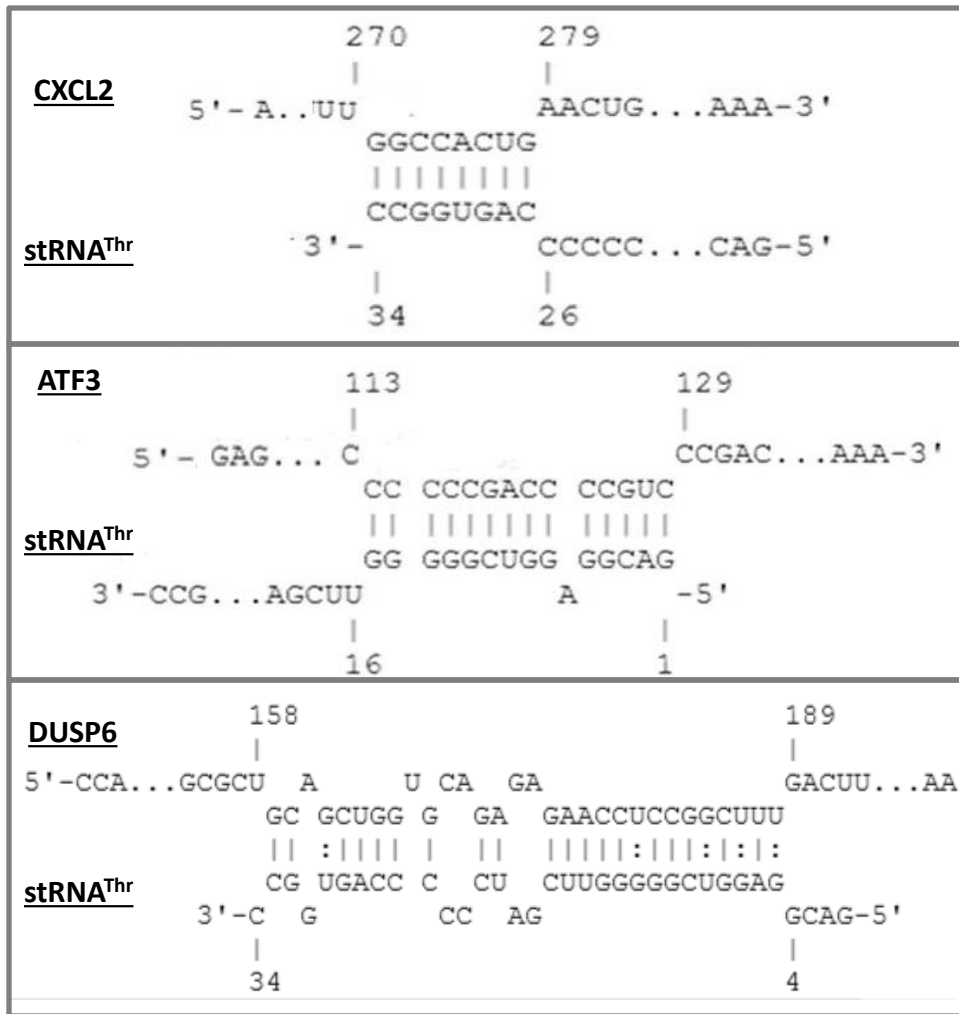

| mRNA  | Energy (kcal/mol) | Position stRNA | Position mRNA |
|-------|-------------------|----------------|---------------|
| CXCL2 | -11,746           | 27-34          | 271-278       |
| ATF3  | -11,6             | 1-15           | 114-128       |
| DUSP6 | -11,807           | 5-33           | 159-188       |

**Supplementary Figure 1: Bioinformatic prediction for target sites for tsRNA Thr in the mRNAs studied.** Bioinformatic prediction (<http://rna.informatik.uni-freiburg.de:8080/v1/IntaRNA.jsp>, IntaRNav1.2.5) of putative binding sites for tsRNA<sup>Thr</sup> in ATF3, CXCL2 and DUSP6 transcripts which were found modified after its transfection to HeLa cells. The Figure shows the binding sites and the Table the characteristics of the binding. The corresponding free energy values and the respective positions of interacting sequences are showed in the attached table.
