# Supplementary material for: Gene Expression Changes Induced byTrypanosoma cruziShed Microvesicles in Mammalian Host Cells: Relevance of tRNA-Derived Halves
Source: Hindawi journal article supplement (doi:10.1155/2014/305239), 2014-01-01
Supplement: f1 [file 305239.f1.pdf]

| <b>Oligoribonucleotides for transfections</b>                                                     |                                                        |                    |
|---------------------------------------------------------------------------------------------------|--------------------------------------------------------|--------------------|
| (*: Phosphorothioate bonds – <i>Italics</i> : 2' O-methyl ribonucleotides – Scr: scramble oligos) |                                                        |                    |
| <b>Name</b>                                                                                       | <b>Sequence (5'-3')</b>                                | <b>Fluorophore</b> |
| <b>stRNA-Leu</b>                                                                                  | A*A*C* <i>GUCAAGUCU</i> UAGACCACUCGACCAUCUUG*C*<br>*C* | Cy3                |
| <b>stRNA-Leu-Scr</b>                                                                              | A*C*A* <i>CCAUUACUCGCACU</i> ACCAUCCGACGUAGU*U<br>*G*  | Cy3                |
| <b>stRNA-Thr</b>                                                                                  | G*A*C* <i>GGAGGUCGGGGGUUCGAU</i> CCCCCAGUGG*<br>C*C*   | FAM                |
| <b>stRNA-Thr-Scr</b>                                                                              | G*C*G* <i>GUGC</i> GACGUCCGGUCGGCGAUUCGCAC*<br>A*G*    | FAM                |
| <b>Oligoprobes used for FISH</b>                                                                  |                                                        |                    |
| <b>tRNA Glu<sup>UUC</sup></b>                                                                     | CAGGTGTTGTAACCGTTATACCATATC                            | Cy3                |
| <b>tRNA Glu<sup>CUC</sup></b>                                                                     | CGCTTGTAGCCACTATAACCAC                                 | Cy3                |
| <b>tRNA Asp<sup>GUC</sup></b>                                                                     | CGGGTATACTTACCACTATACTACCGA                            | Cy3                |
| <b>Oligonucleotides used for RT-PCR</b>                                                           |                                                        |                    |
| <b>ATF3 F</b>                                                                                     | GGAGCCTGGAGCAAAATGATG                                  | None               |
| <b>ATF3 R</b>                                                                                     | GACGATGGCAGAAGCACTCA                                   | None               |
| <b>LNX2 F</b>                                                                                     | GCATGAGCCACTCTGCACTA                                   | None               |
| <b>LNX2 R</b>                                                                                     | GCCAGGCCAACAAATAACGG                                   | None               |
| <b>PRAME F</b>                                                                                    | CAAGCGTTGGAGGTCCTGAG                                   | None               |
| <b>PRAME R</b>                                                                                    | TCTGAATGGAACCCCGCAA                                    | None               |
| <b>DUSP6 F</b>                                                                                    | GCGGATCAGCTCTGACTCTT                                   | None               |
| <b>DUSP6 R</b>                                                                                    | CCATCCGAGTCTGTTGCACT                                   | None               |
| <b>CXCL2 F</b>                                                                                    | ACGGCAGGGAAATGTATGTGT                                  | None               |

|                |                        |      |
|----------------|------------------------|------|
| <b>CXCL2 R</b> | TCGAAACCTCTCTGCTCTAACA | None |
| <b>GAPDH F</b> | CCAGTGGACTCCACGACGTA   | None |
| <b>GAPDH R</b> | GCGAGATCCCTCCAAAATCA   | None |
